# Supplementary material for: Fabrication of ordered single-crystalline CuInSe2 nanowire arrays
Source: Royal Society of Chemistry journal article supplement (doi:10.1039/c002638g), 2010-01-01
Supplement: c002638g.pdf [file c002638g.pdf]

## Supporting Information

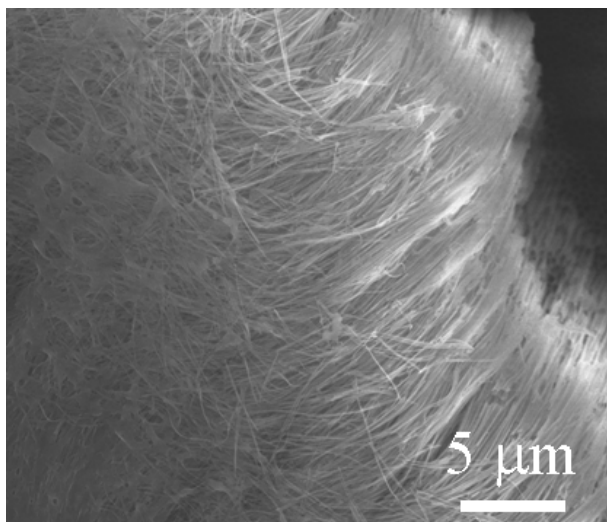

**Figure S1** a typical SEM images of the as-prepared CuInSe<sub>2</sub> nanowires array prepared with AAO template of 100 nm pore size.

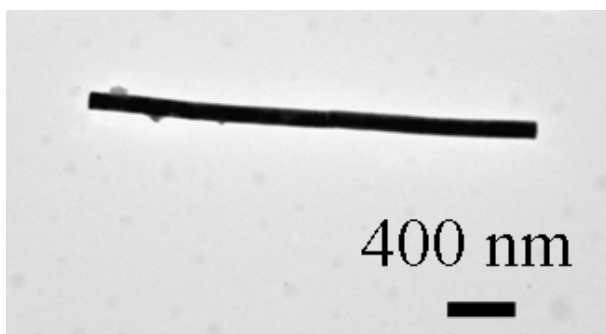

**Figure S2** A TEM image of the as-prepared CuInSe<sub>2</sub> nanowires array prepared with AAO template of 100 nm pore size.

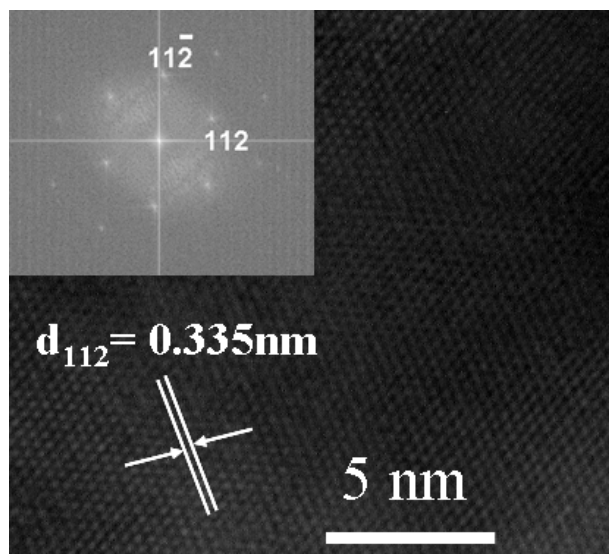

**Figure S3** A HRTEM image of the as-prepared CuInSe<sub>2</sub> nanowires array prepared with AAO template of 100 nm pore size. The inset shows a two-dimensional Fourier transform pattern of the lattice resolved image.
